# Supplementary material for: Ultra-Small and Metabolizable Near-Infrared Au/Gd Nanoclusters for Targeted FL/MRI Imaging and Cancer Theranostics
Source: MDPI journal article supplement (doi:10.3390/bios12080558), 2022-07-24
Supplement: s1 [file s1]

## Supporting Information

# Ultra-Small and Metabolizable Near-Infrared Au/Gd Nanoclusters for Targeted FL/MRI Imaging and Cancer Theranostics

Xiawei Dong <sup>1,†</sup>, Jing Ye <sup>1,†</sup>, Yihan Wang <sup>1</sup>, Hongjie Xiong <sup>1</sup>, Hui Jiang <sup>1</sup>, Hongbing Lu <sup>2</sup>, Xiaohui Liu <sup>1,\*</sup> and Xuemei Wang <sup>1,\*</sup>

<sup>1</sup> State Key Laboratory of Bioelectronics (Chien-Shiung Wu Laboratory), School of Biological Science and Medical Engineering, Southeast University, Nanjing 210096, China; dongxwseu@163.com (X.D.); jing832808@163.com (J.Y.); yihanwangxynu@163.com (Y.W.); 18056356092@163.com (H.X.); 101010998@seu.edu.cn (H.J.)

<sup>2</sup> Department of Biomedical Engineering/Computer Application, Fourth Military Medical University, Xi'an 710032, China; luhb@fmmu.edu.cn

\* Correspondence: 101013182@seu.edu.cn (X.L.); xuewang@seu.edu.cn (X.W.); Tel.: +86-25-83792177 (X.L. & X.W.)

† These authors contributed equally to this work.

## Supplemental Figures and Tables

**Table S1** Maximum emission wavelength and fluorescence quantum yield of Au/Gd@BSA NCs with different mole ratios.

| Number | molar ratio | Maximum emission wavelength (nm) | fluorescence quantum yield (%) |
|--------|-------------|----------------------------------|--------------------------------|
| a      | 1:1         | 660                              | 3.8%                           |
| b      | 1:1.5       | 690                              | 4.4%                           |
| c      | 1:2         | 670                              | 4.1%                           |

**Table S2** EDS of Au/Gd@FA NCs.

| Element | wt%   | At%   |
|---------|-------|-------|
| C       | 45.64 | 52.11 |
| N       | 22.73 | 22.26 |
| O       | 29.74 | 25.49 |
| Au      | 1.72  | 0.12  |
| Gd      | 0.16  | 0.02  |

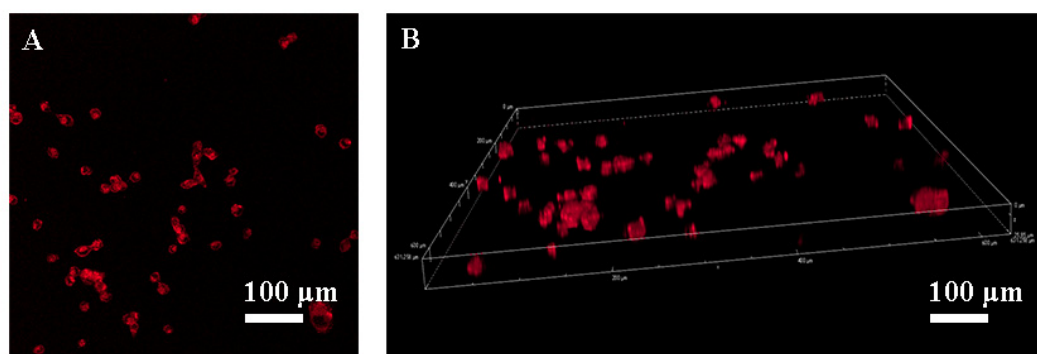

**Figure S1.** 3D confocal near-infrared fluorescence images of 4T1 cells after 6 h treatment with Au/Gd@FA NCs (60 μg/mL) at 37°C. (A) confocal near-infrared fluorescence images. (B) 3D confocal near-infrared fluorescence images.

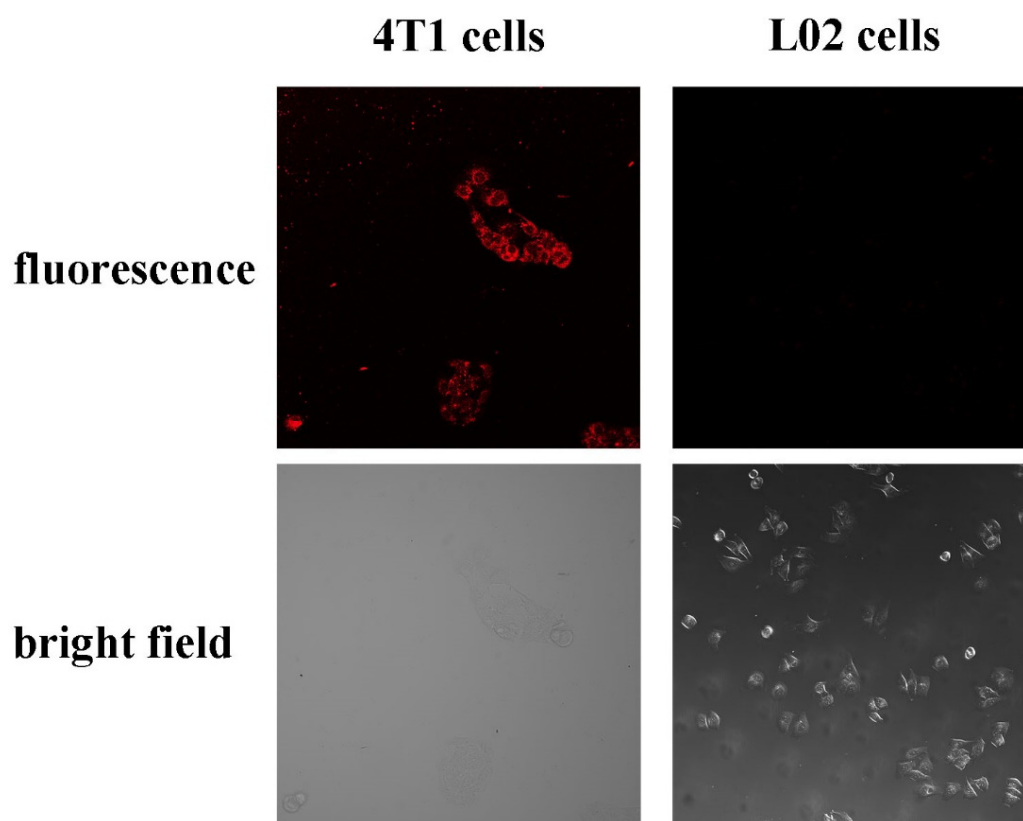

**Figure S2.** Confocal near-infrared fluorescence images of 4T1 cells and L02 cells after 6 h treatment with Au/Gd@FA NCs (60  $\mu\text{g}/\text{mL}$ ) at 37°C.

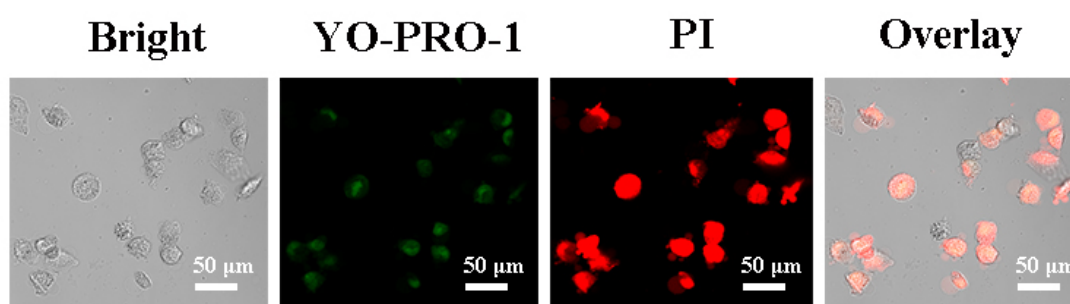

**Figure S3.** Confocal fluorescence images of 4T1 cells treatment with Au/Gd@FA NCs (60  $\mu\text{g}/\text{mL}$ ) at 37°C for 8h under 660 nm ( $1.2 \text{ W}/\text{cm}^2$ ) laser irradiation, which detected by YO-PRO-1/PI apoptosis kit.
